# Supplementary figures and images for: Unusual multisystemic involvement and a novel BAG3 mutation revealed by NGS screening in a large cohort of myofibrillar myopathies
Source: Springer Nature journal article supplement (doi:10.1186/s13023-014-0121-9), 2014-07-31

Myofibrillar myopathy

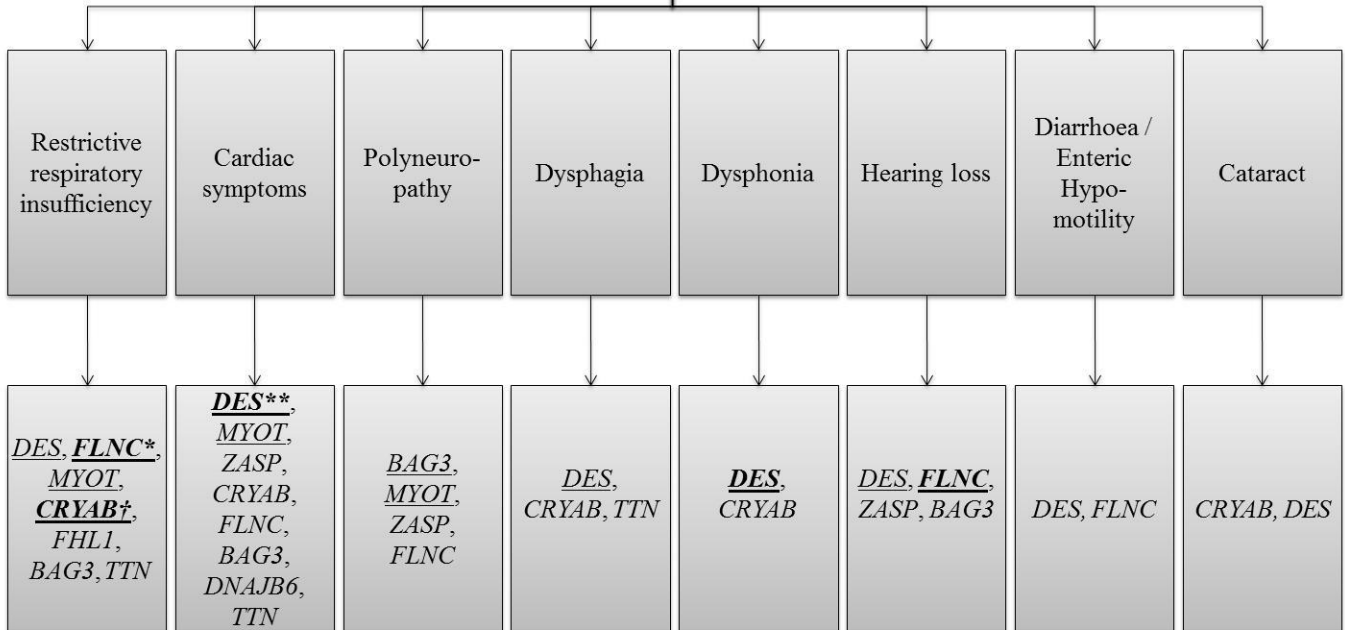

Supplement: MOESM5 [file 9775820]
